# Supplementary material for: Origin and dispersion pathways of guava in the Galapagos Islands inferred through genetics and historical records
Source: PubMed Central journal article supplement (PMC8571588; doi:10.1002/ece3.8193), 2021-10-04

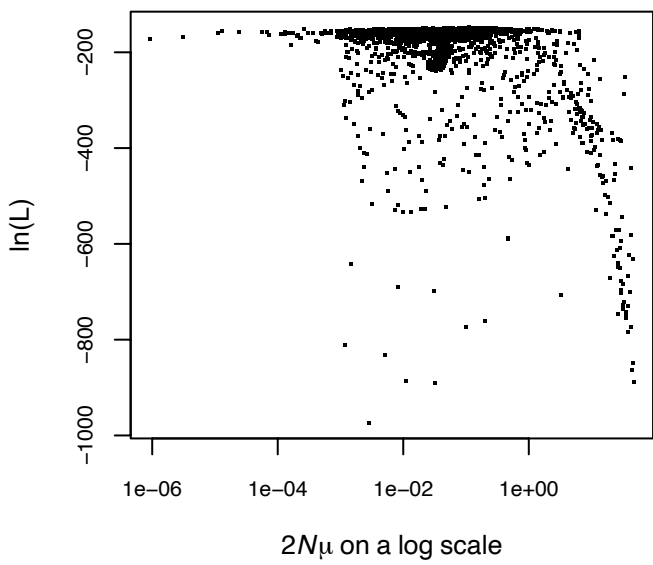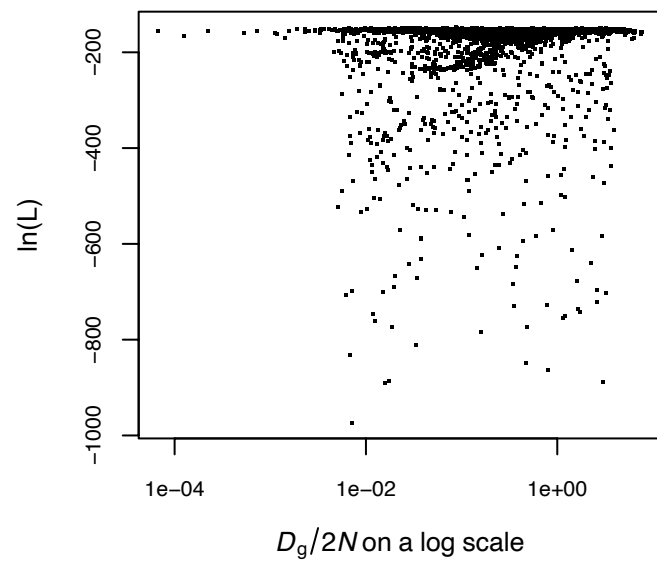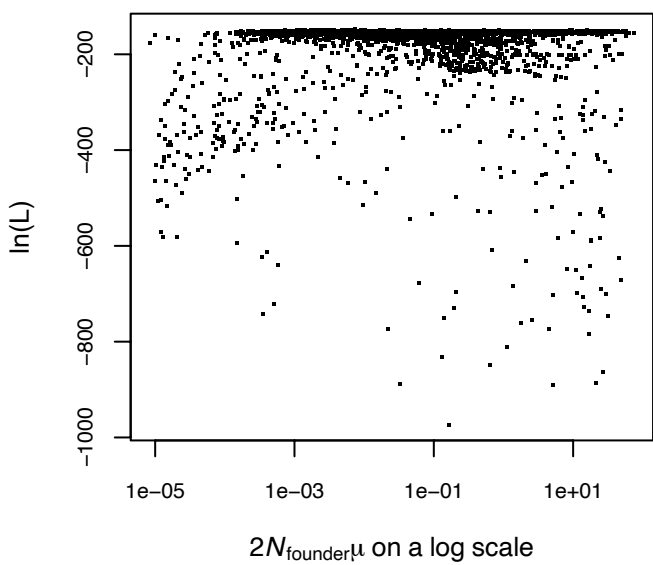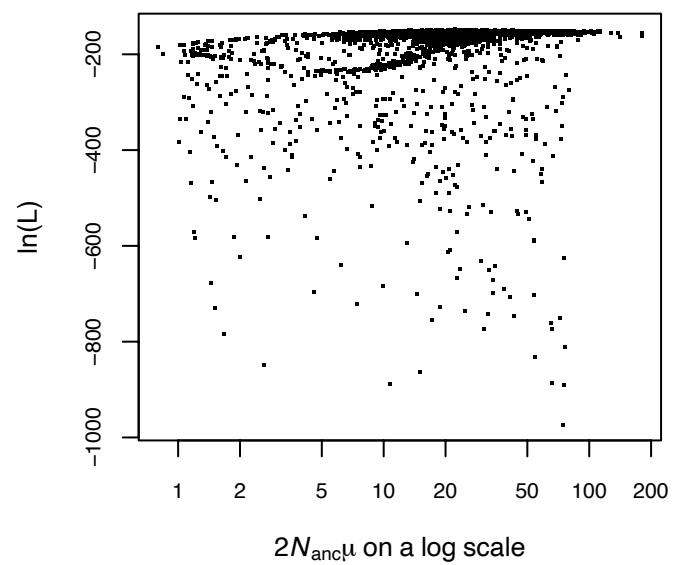

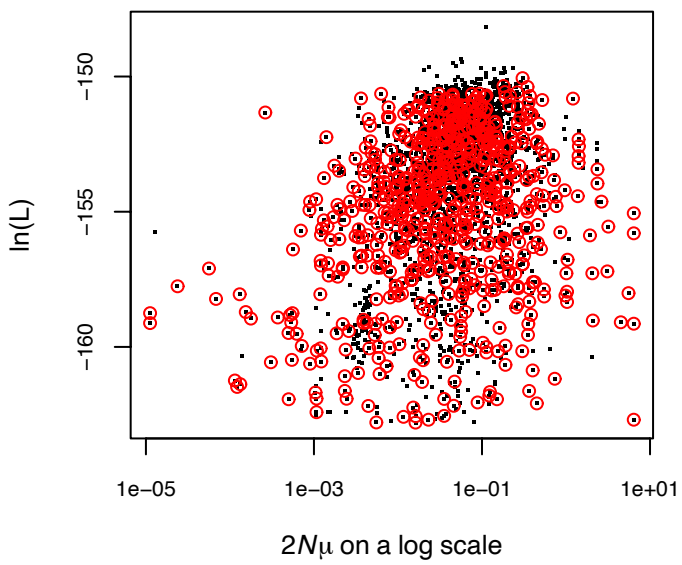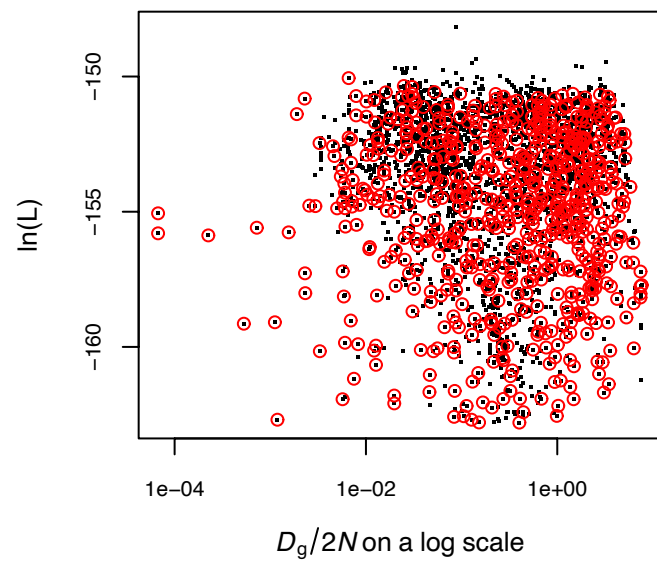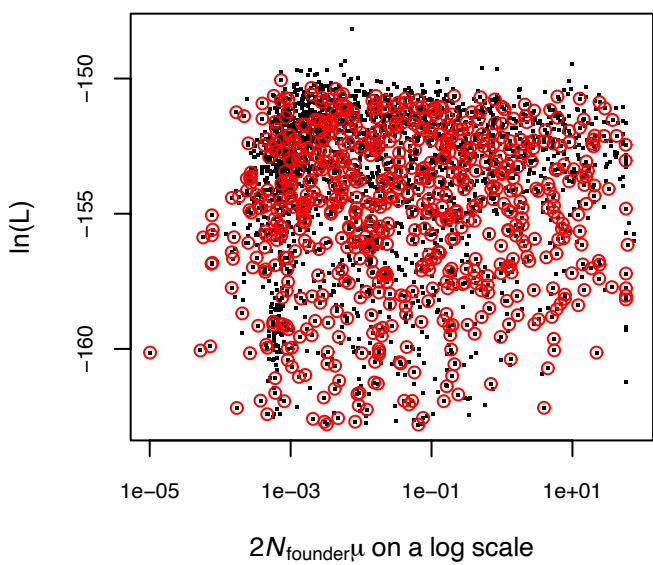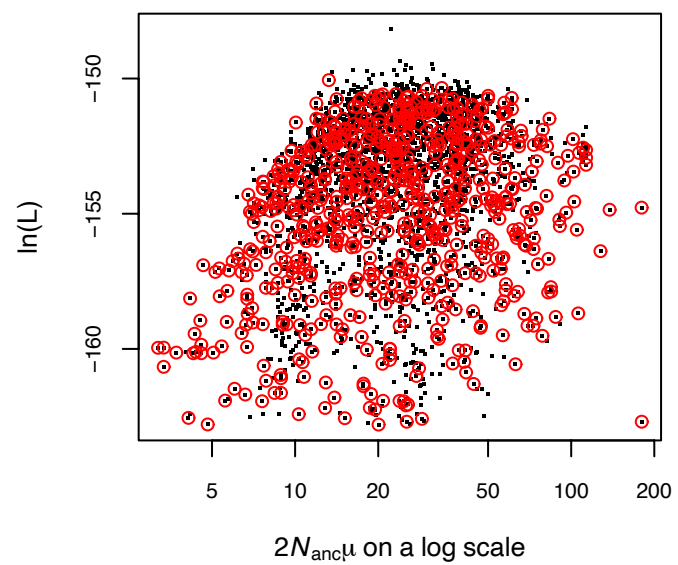

### One-parameter likelihood ratio profiles

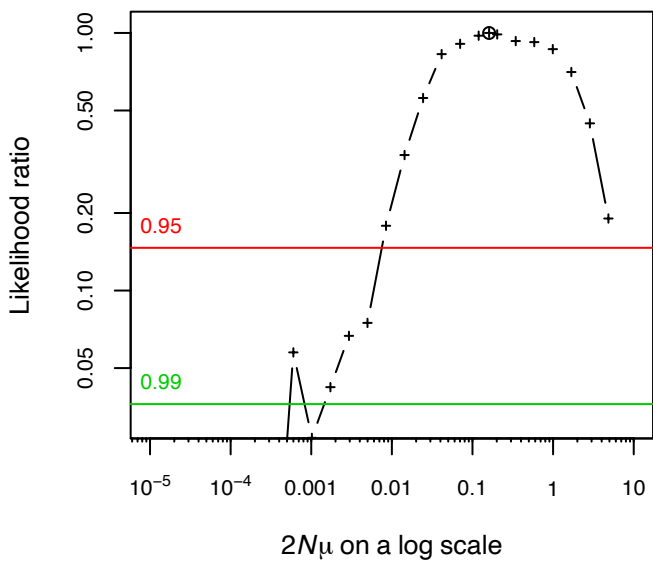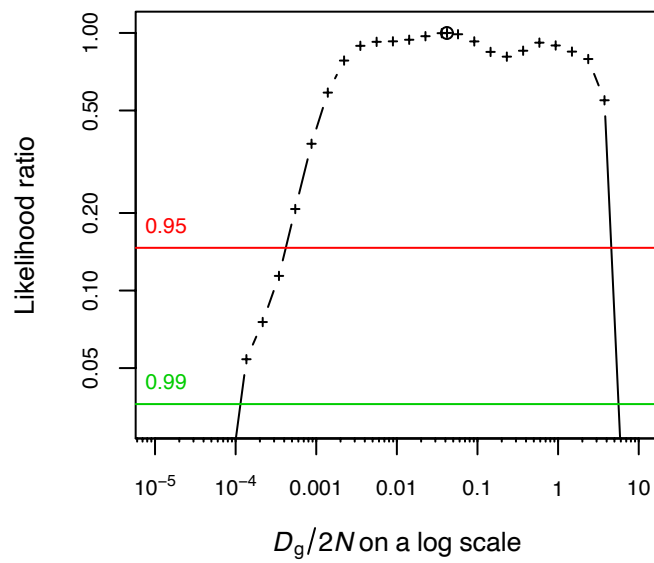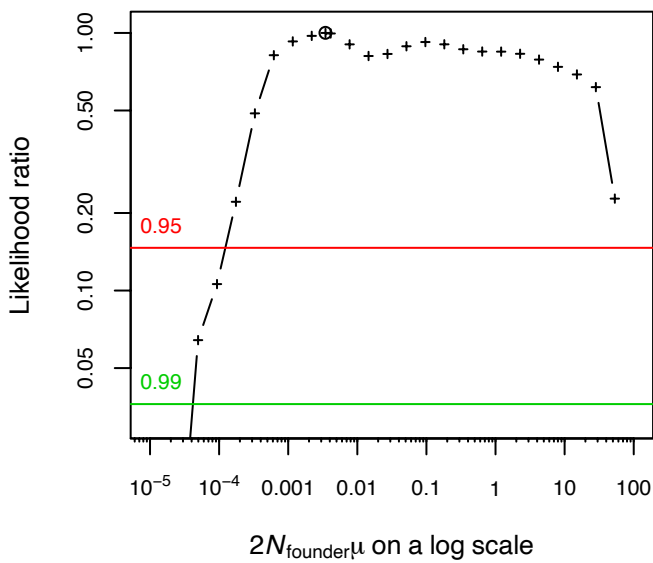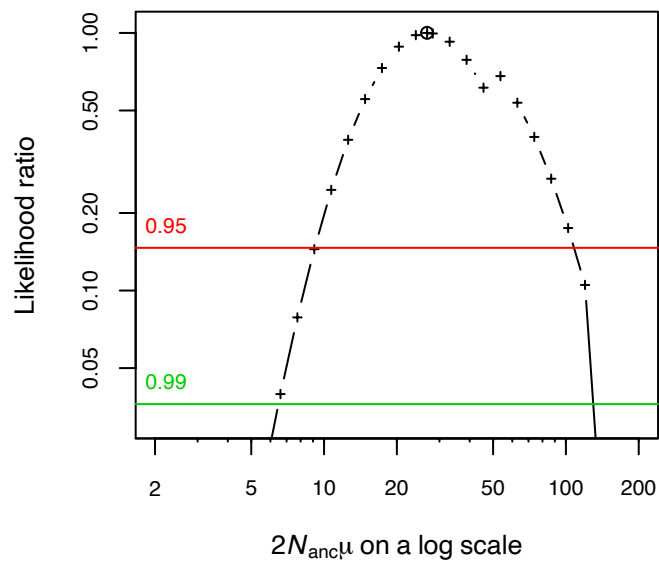

### One-parameter likelihood ratio profiles

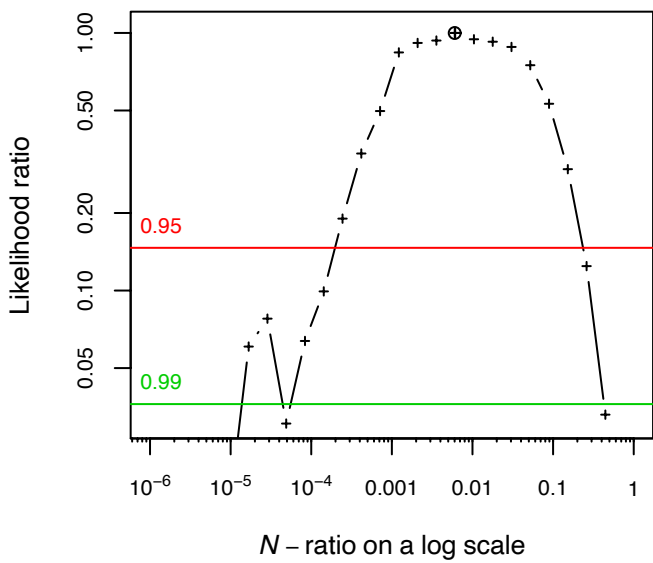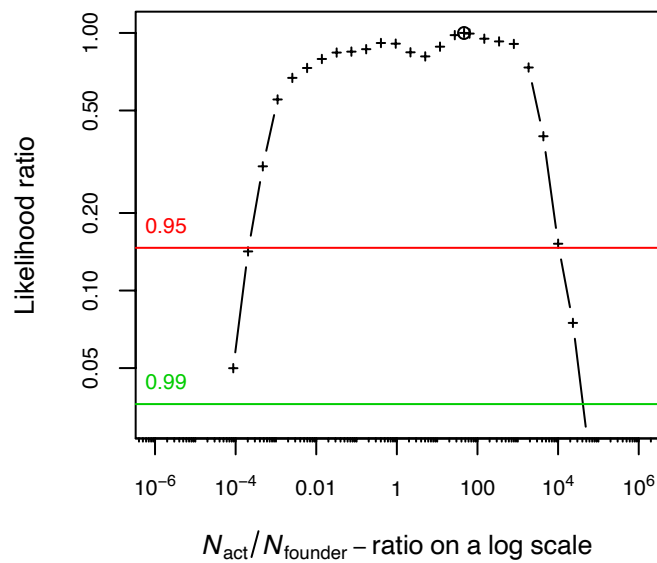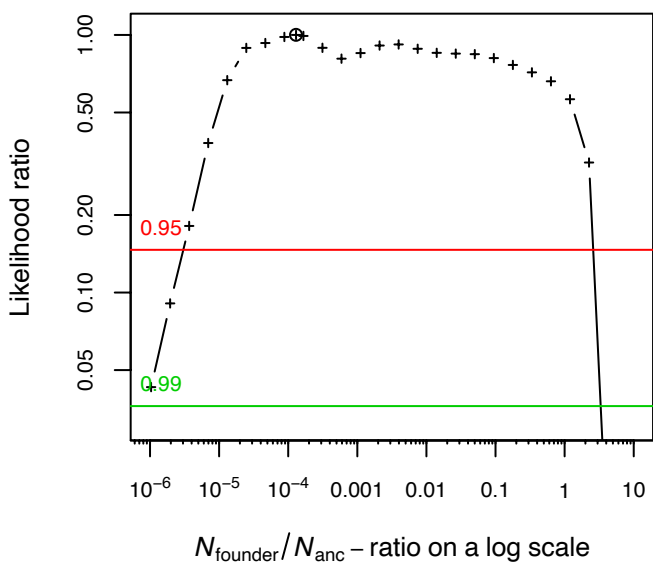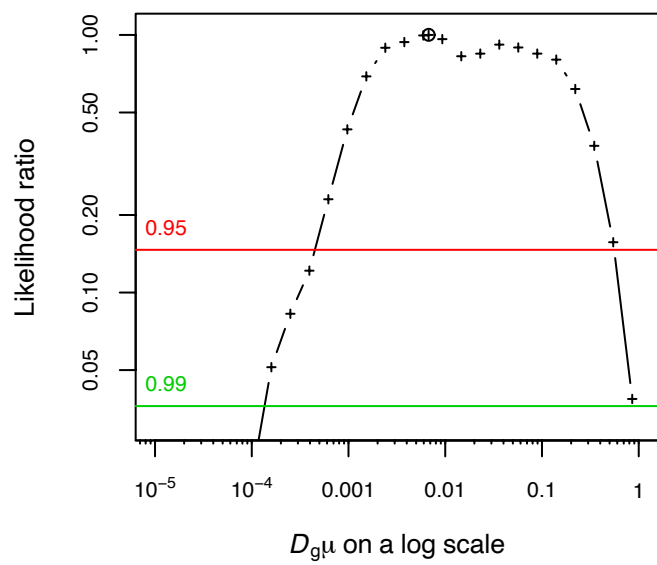

### Profile likelihood ratio

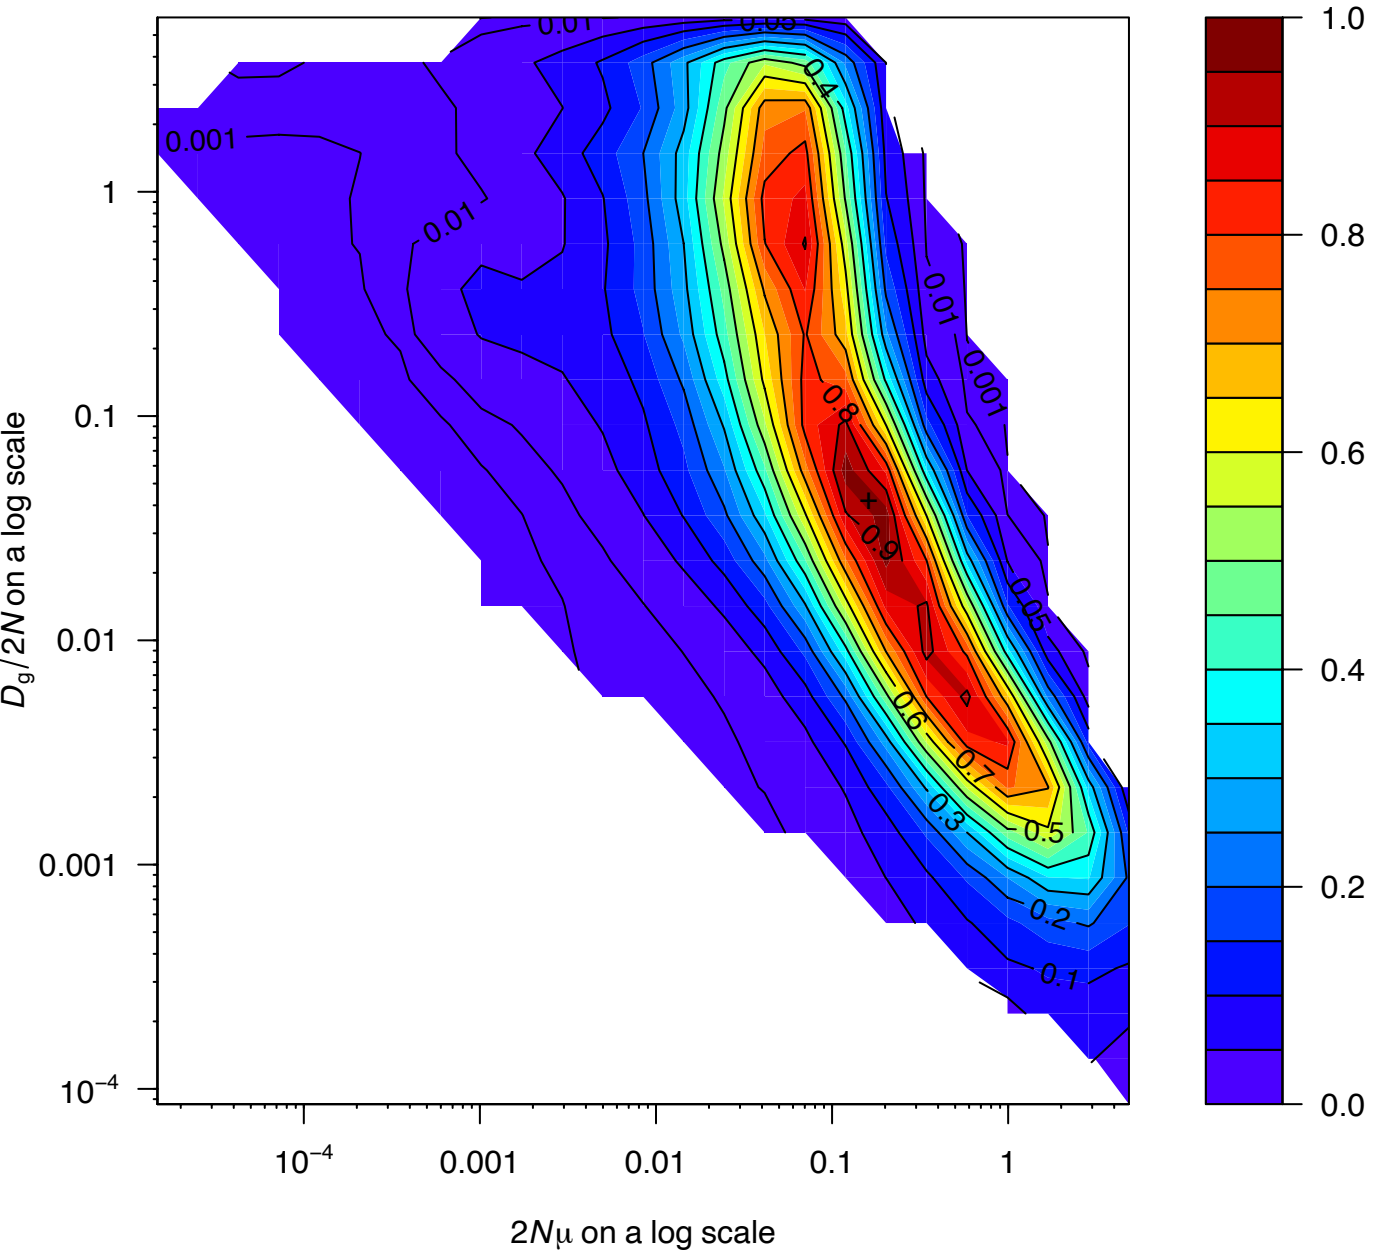

### Profile likelihood ratio

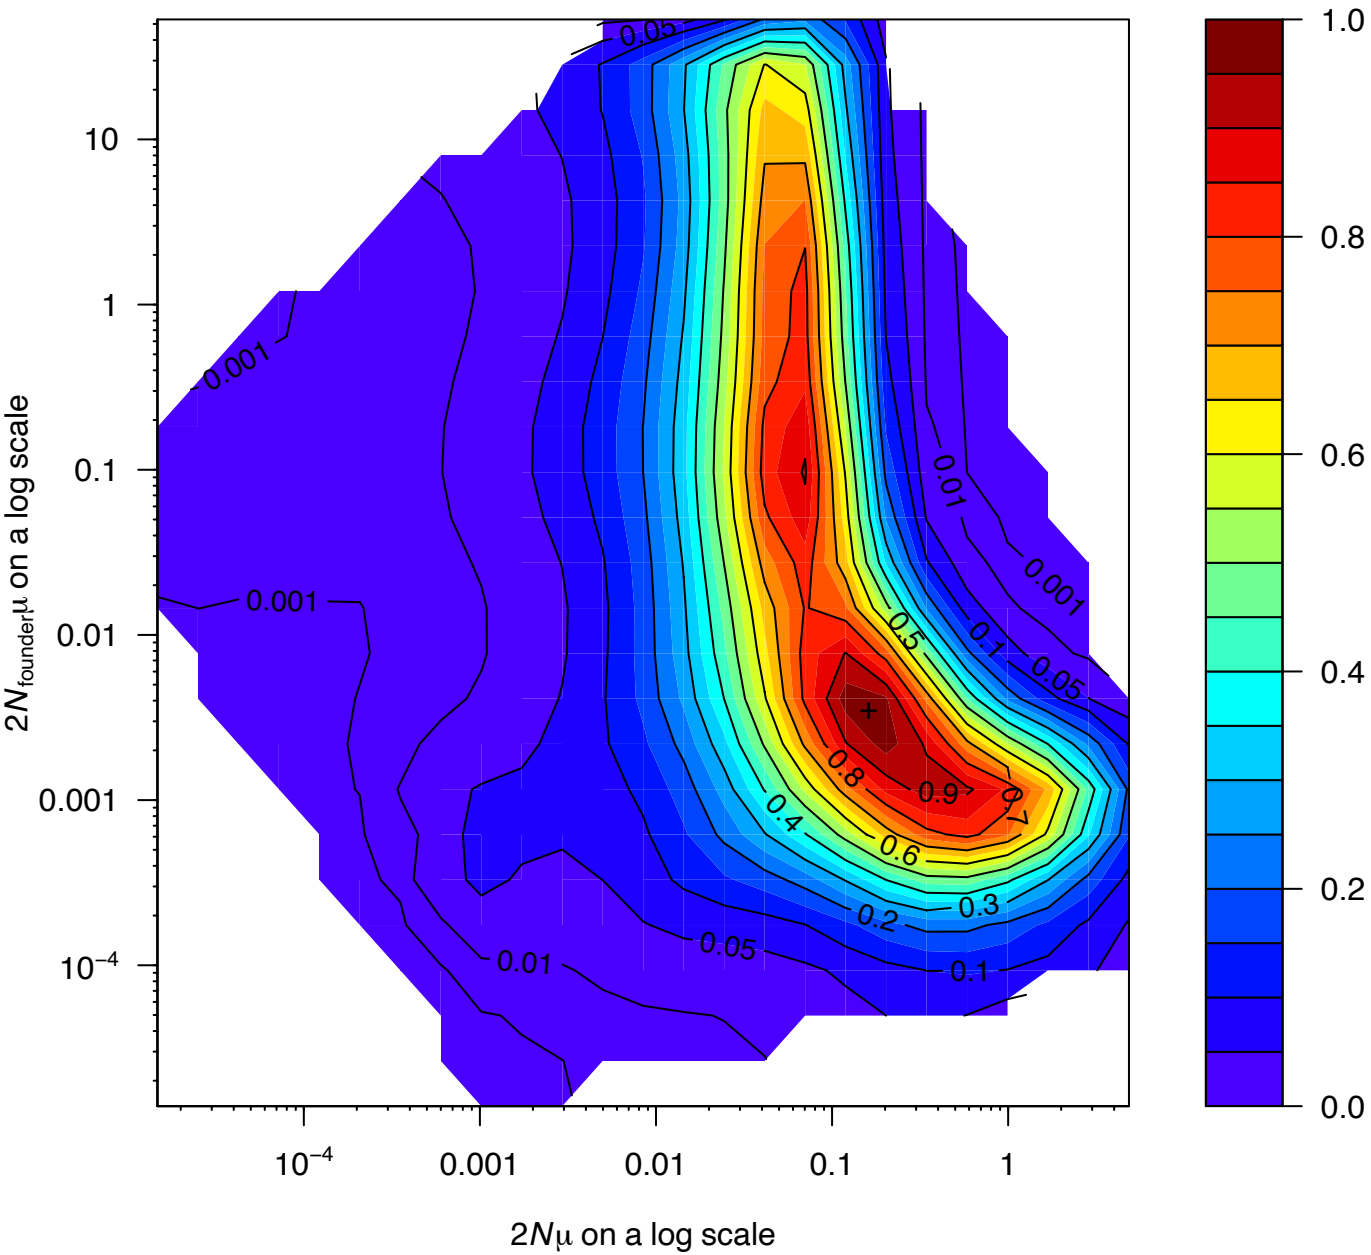

### Profile likelihood ratio

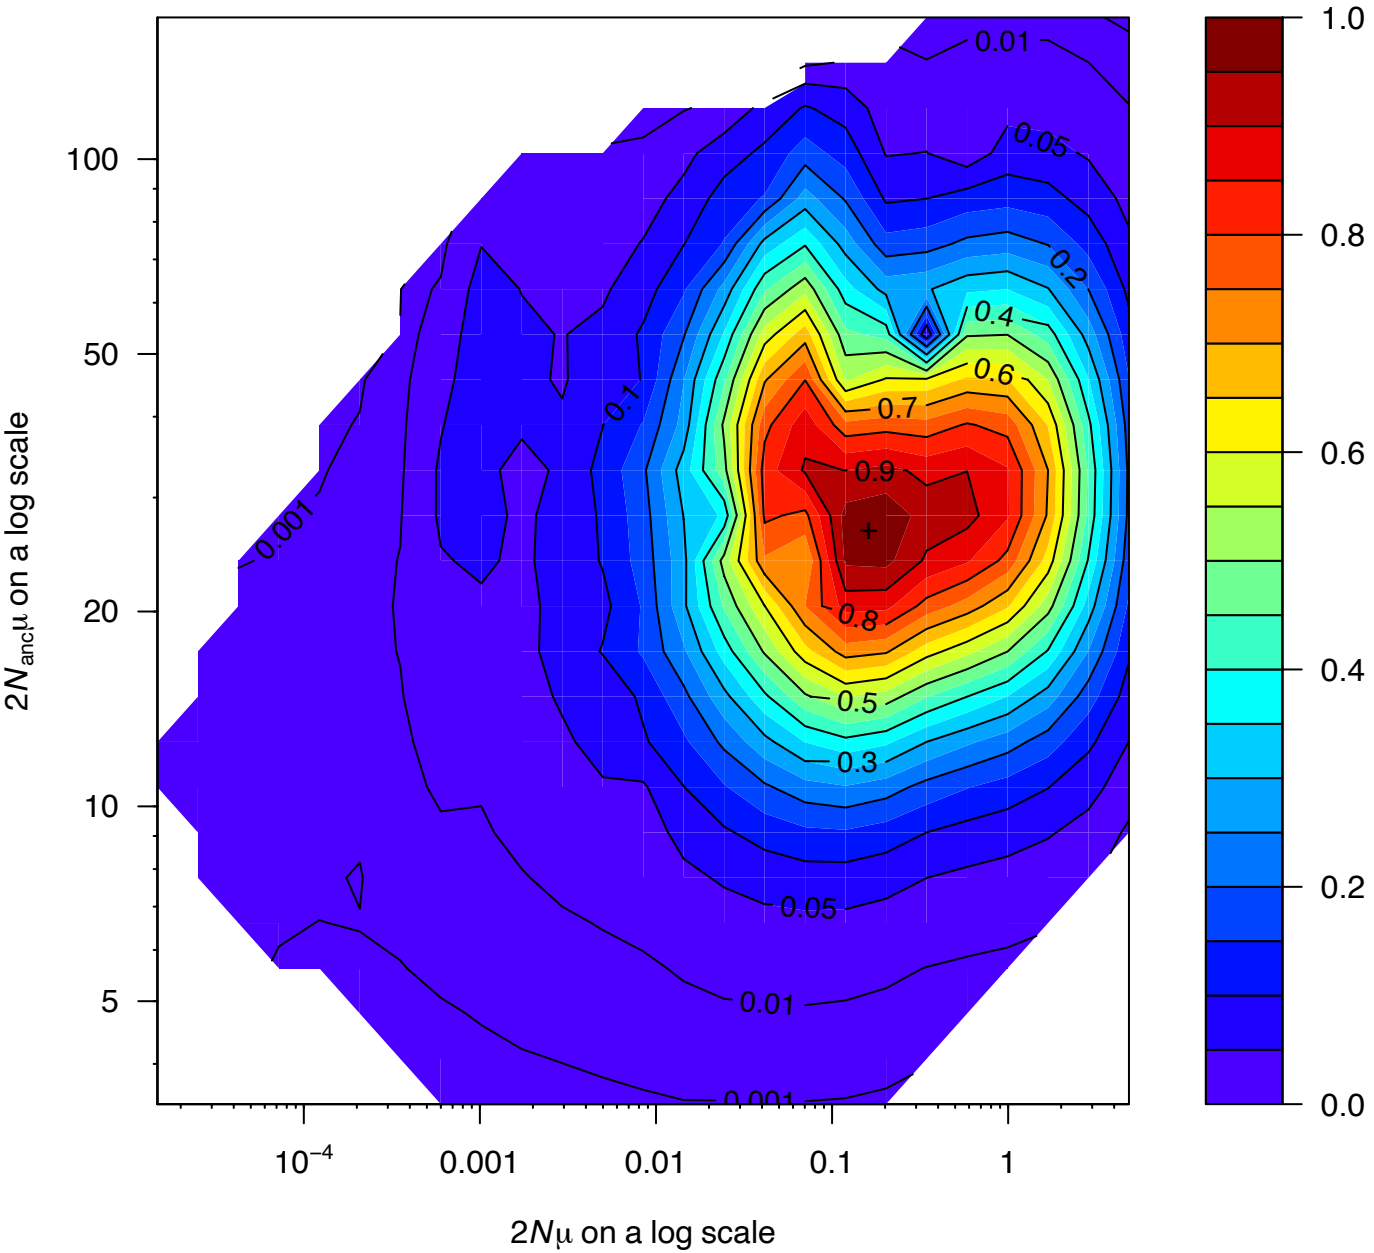

### Profile likelihood ratio

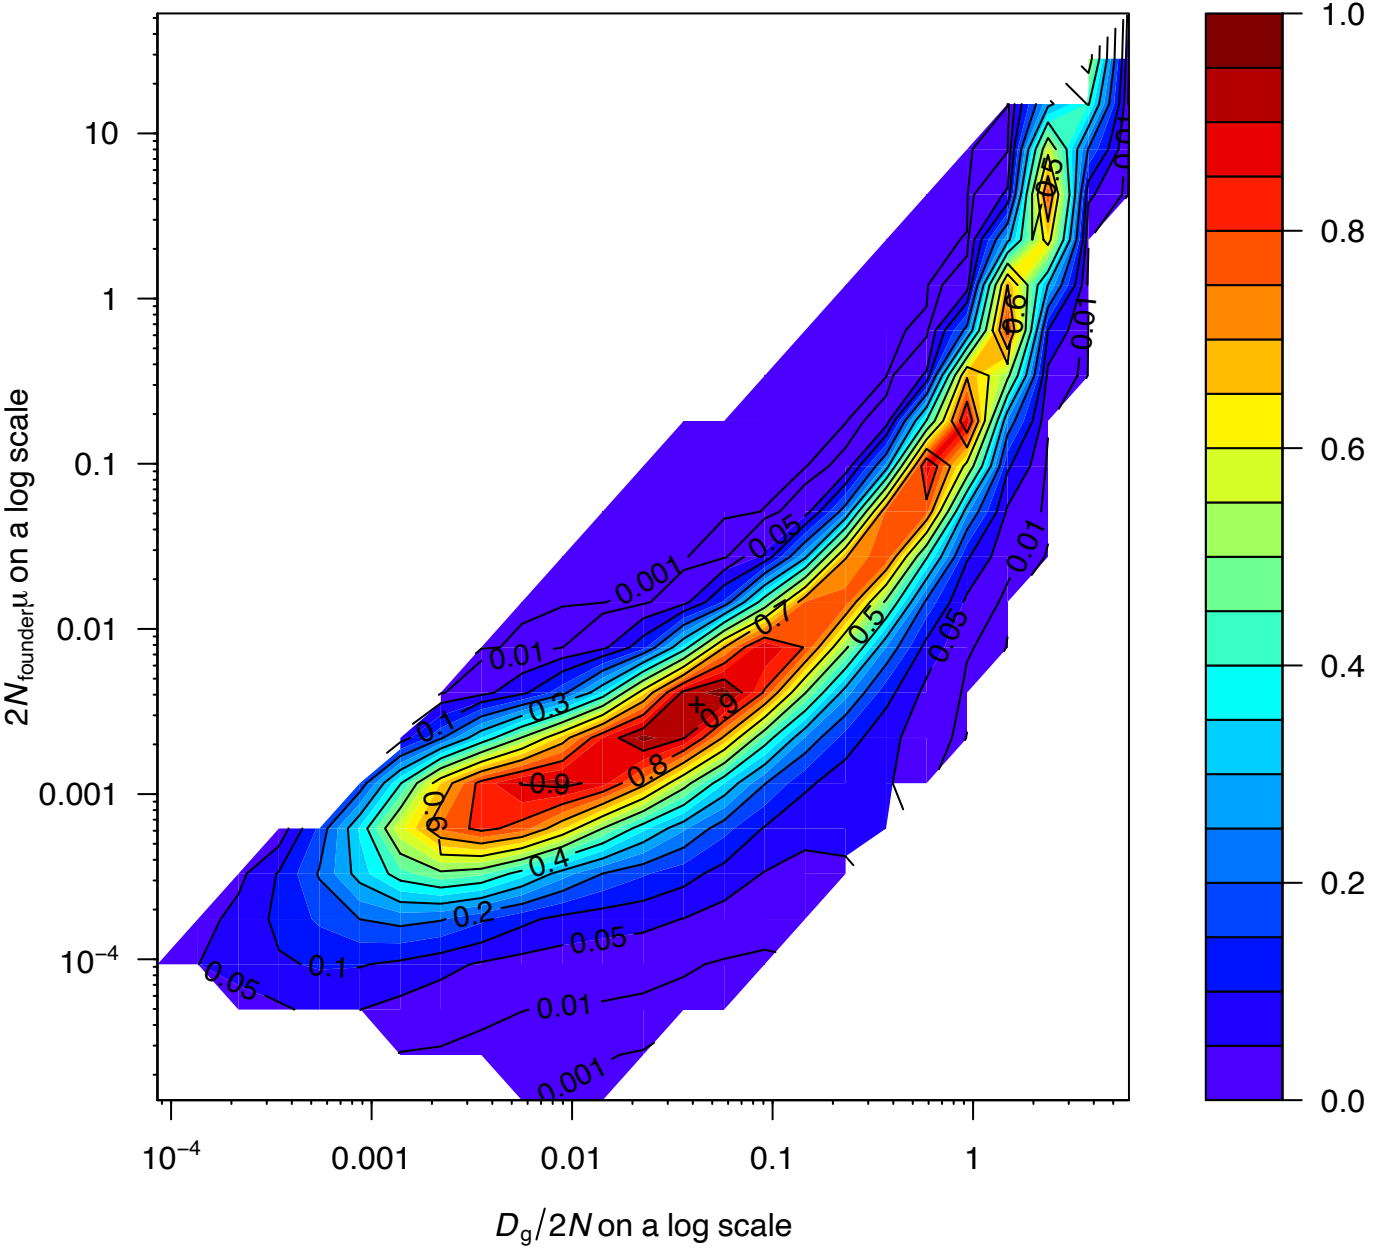



### Profile likelihood ratio

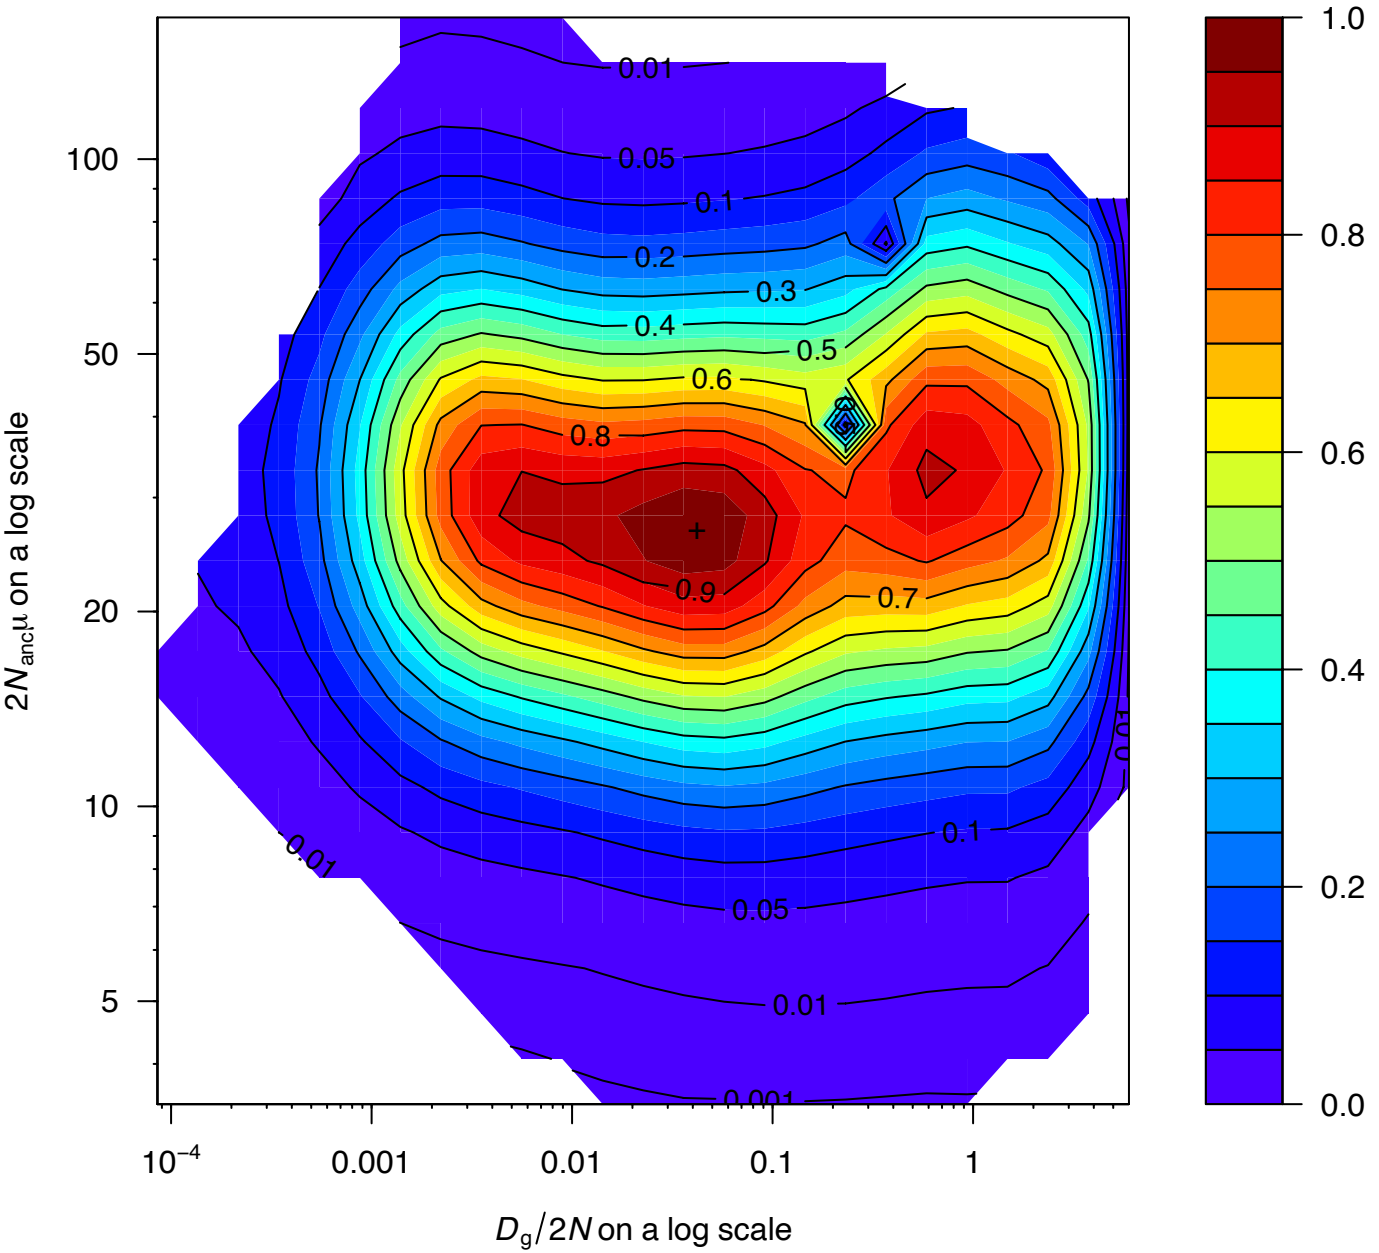

### Profile likelihood ratio

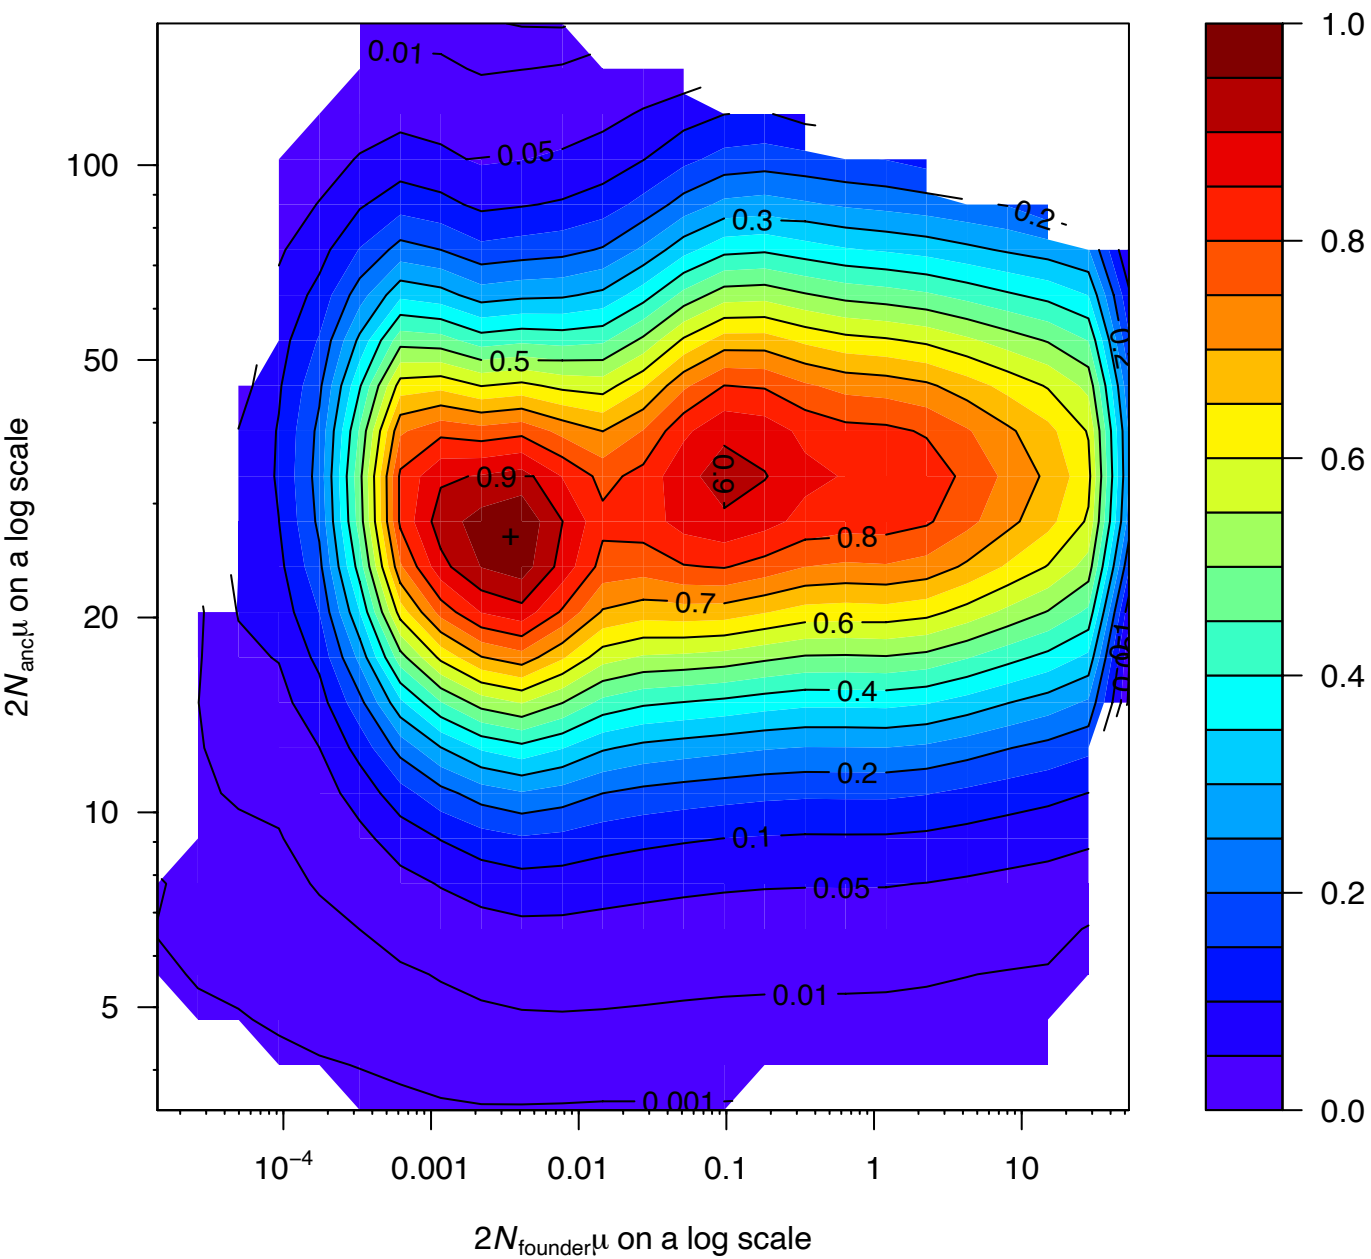

### One-parameter likelihood ratio profiles

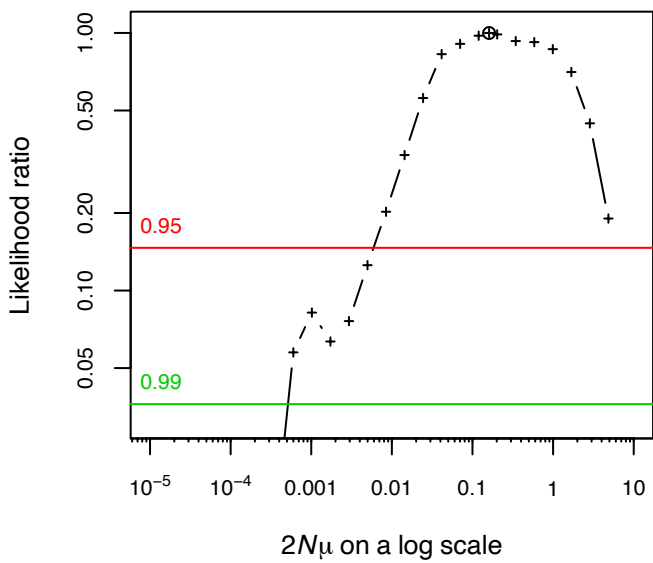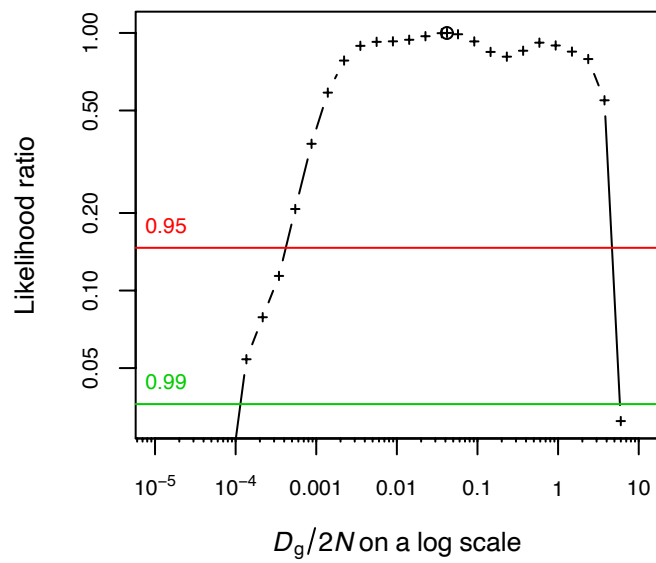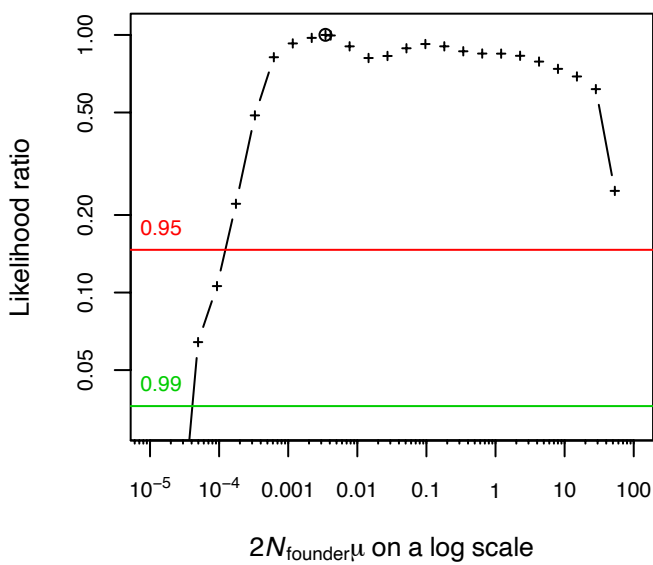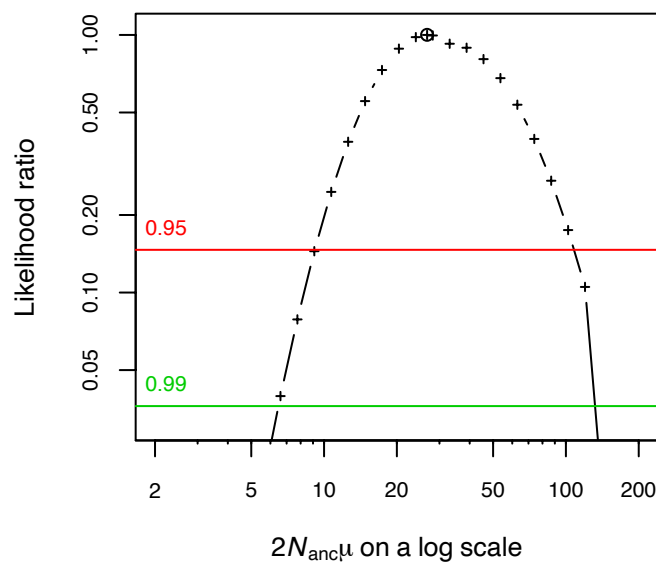

### One-parameter likelihood ratio profiles

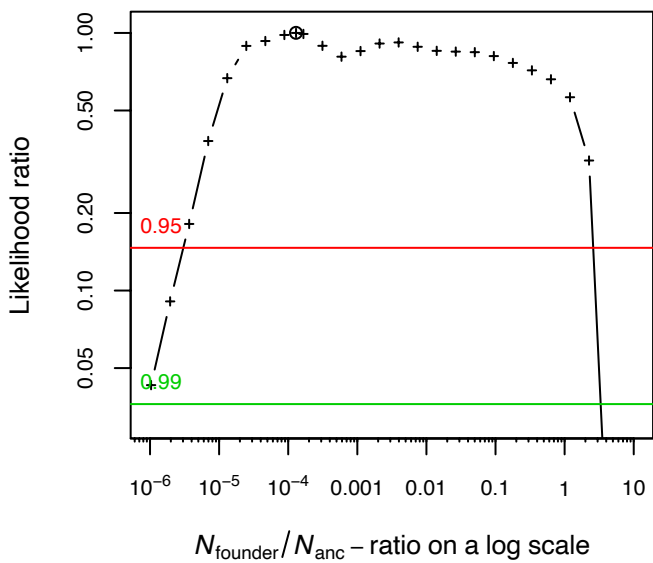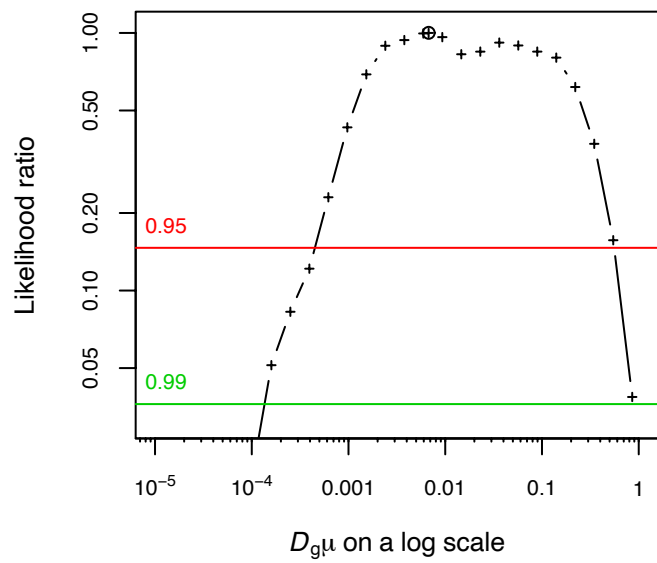



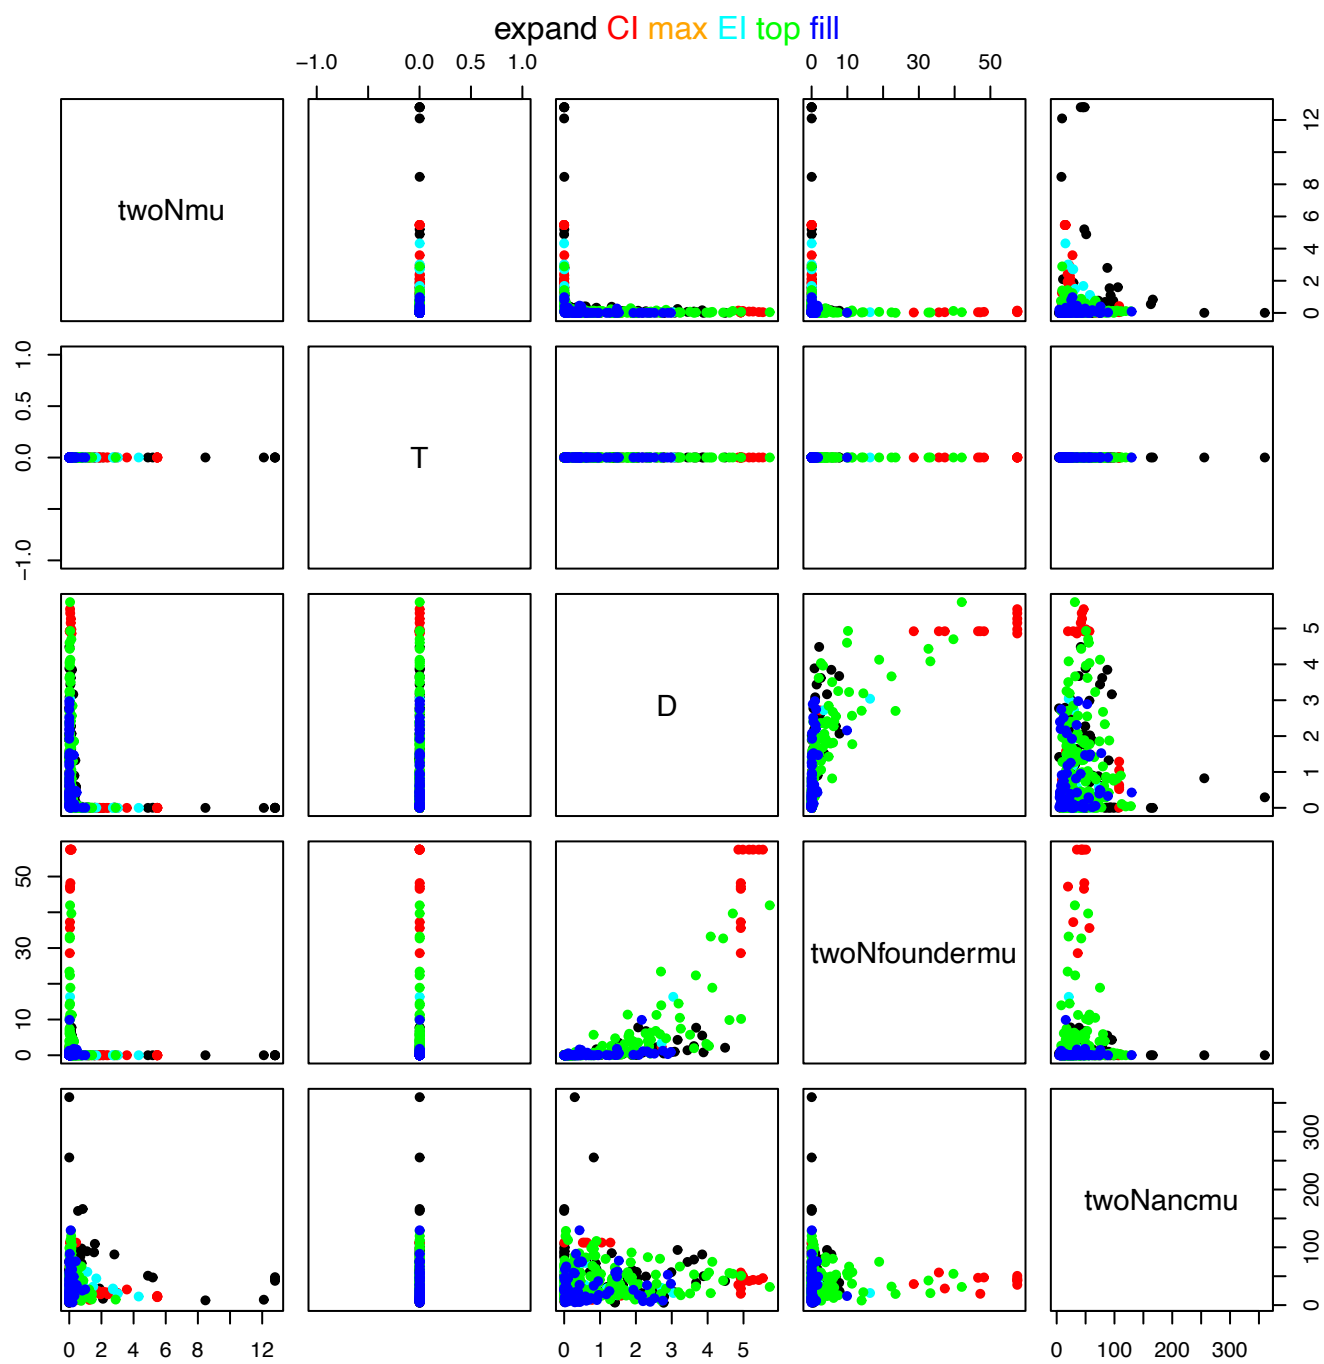

Supplement: ECE3-11-15111-s002.pdf [file ECE3-11-15111-s002.pdf]
