# Supplementary material for: Origin and dispersion pathways of guava in the Galapagos Islands inferred through genetics and historical records
Source: PubMed Central journal article supplement (PMC8571588; doi:10.1002/ece3.8193), 2021-10-04

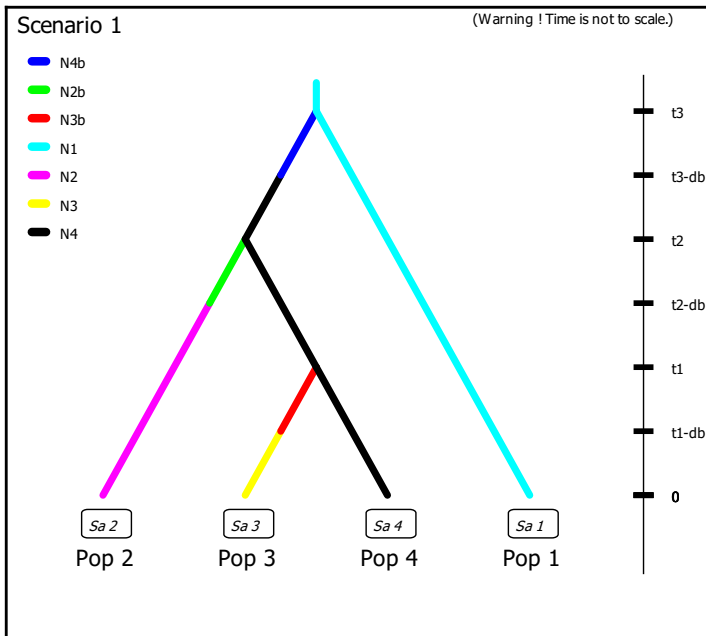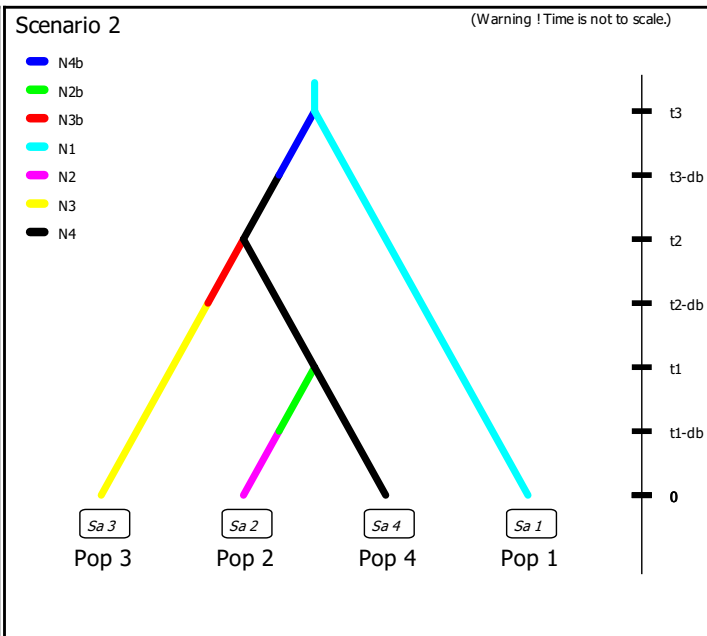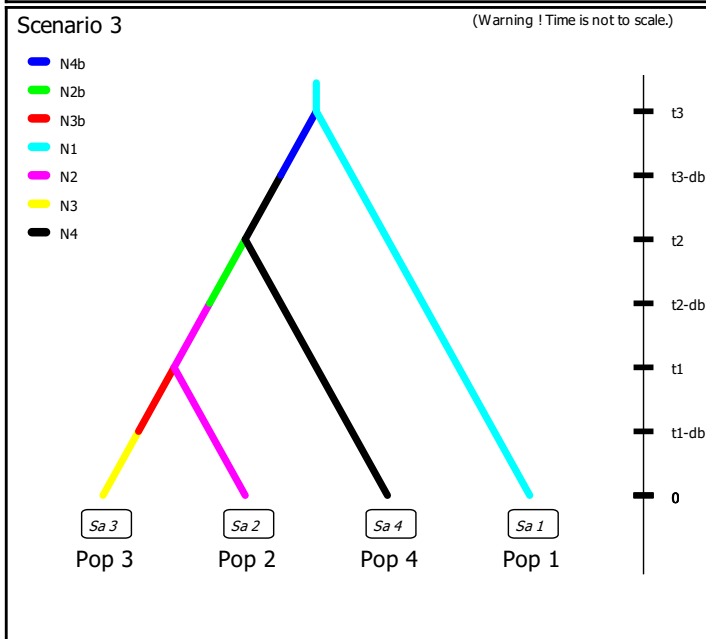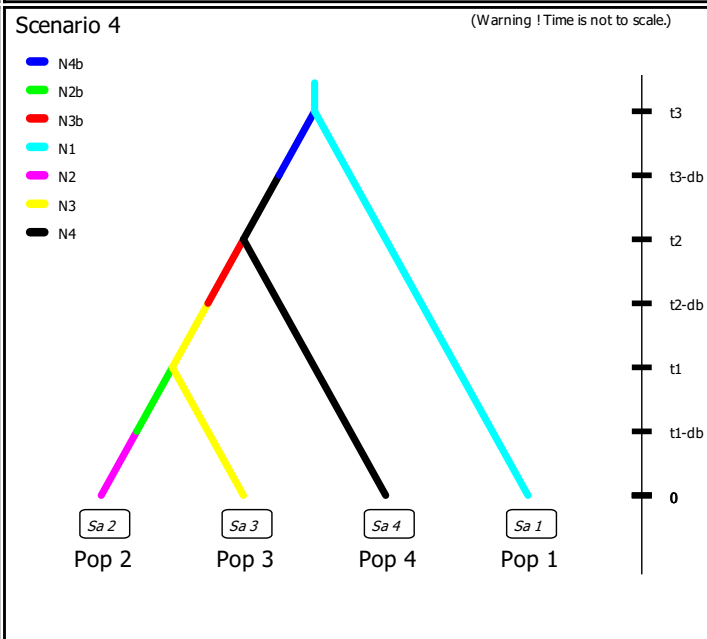

Scenario 5

N1 N2 N3 N4  
 0 sample 1  
 0 sample 2  
 0 sample 3  
 0 sample 4  
 t1 split 3 4 1 ra  
 t2 split 2 4 1 ra  
 t3-db VarNe 4 N4b  
 t3 merge 1 4

Scenario 6

N1 N2 N3 N4  
 0 sample 1  
 0 sample 2  
 0 sample 3  
 0 sample 4  
 t1 split 2 4 1 ra  
 t2 split 3 4 1 ra  
 t3-db VarNe 4 N4b  
 t3 merge 1 4

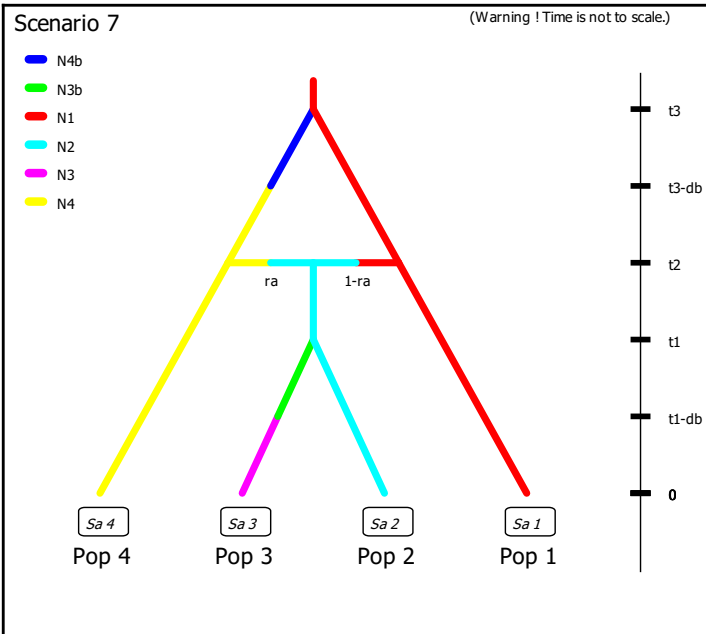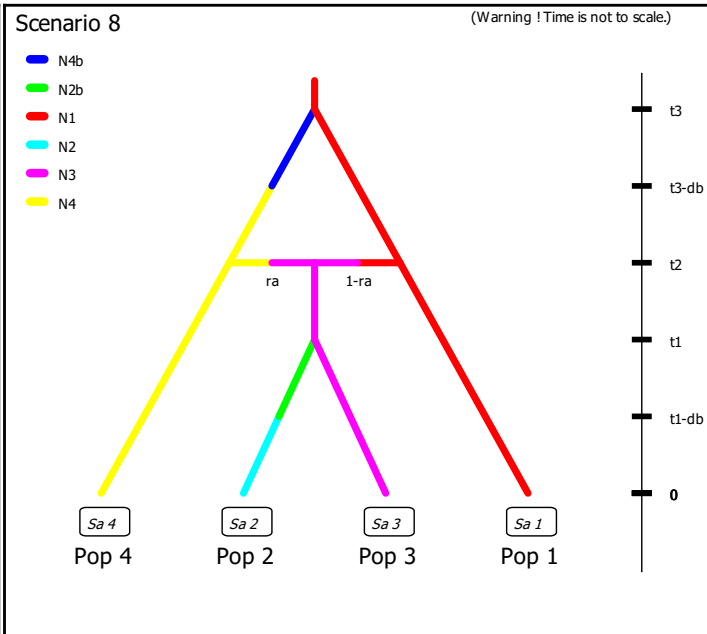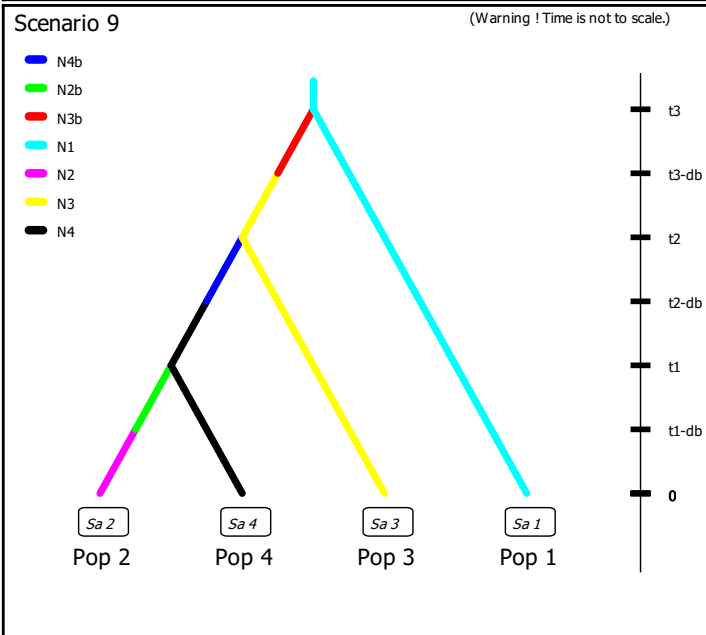

Supplement: ECE3-11-15111-s004.pdf [file ECE3-11-15111-s004.pdf]
